# Supplementary material for: Biodegradation of 17α-Ethinylestradiol by Strains of Aeromonas Genus Isolated from Acid Mine Drainage
Source: MDPI journal article supplement (doi:10.3390/cleantechnol6010008), 2024-02-01
Supplement: s1 [file s1]

### Electronic supplementary material

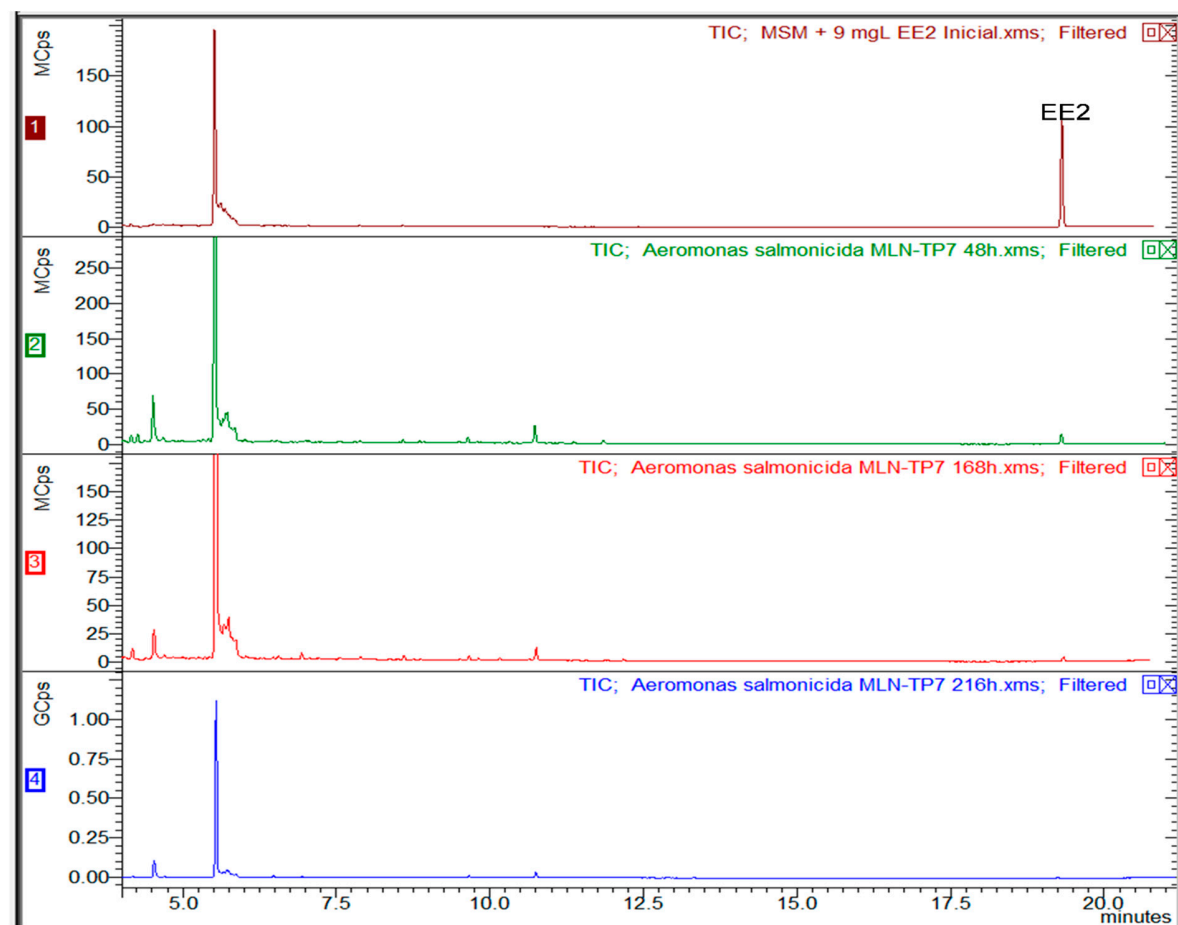

**Figure S1.** Representative chromatograms of the identification of putative EE2 biodegradation products in the medium with an initial concentration of EE2 of 9 mg/L. Detectable peaks after 48 h, 168 h and after 216 h.
